# Supplementary material for: YAP charge patterning mediates signal integration through transcriptional co-condensates
Source: Research Square preprint supplement (doi:10.21203/rs.3.rs-5228191/v1), 2024-11-05
Supplement: Supplementary file 1 [file b572d57767b90e278e3c0224.pdf]

## Supplementary Figures

A

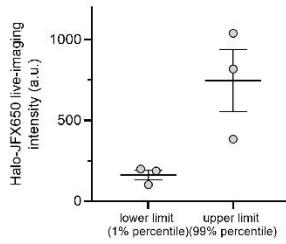

B

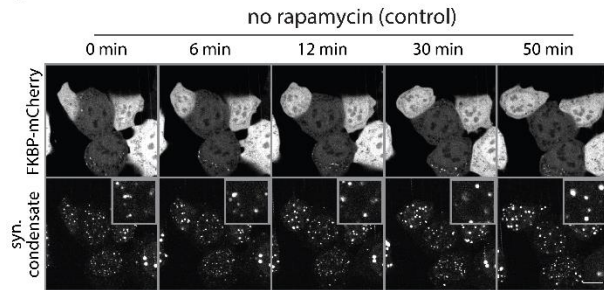

C

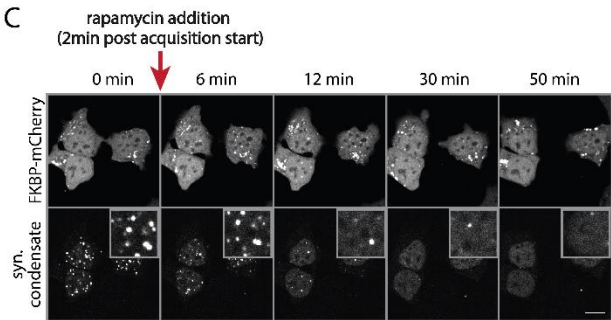

**Figure S1 Verification of mCherry as solubility tag**

**A)** Quantification of the endogenous YAP expression range (1-99% percentile) in the Halo-YAP (JFX650) re-expression system. The Halo-tag (JFX650) cells were IF stained for YAP and compared to IF stains of WT cells. Shown is the Halo-YAP (JFX650) intensity (y-axis) corresponding to the lower 1% percentile and upper 99% percentile of the WT distributions (x-axis). Shown are mean  $\pm$  SEM from N = 3 independent experiments. **B-C)** Verification of mCherry as a solubility tag in mESCs using the synthetic condensate system (SPARK-ON). Cells expressing the SPARK-ON components and FKBP-mCherry (top row). Pre-formed synthetic condensates (bottom row) were left untreated (B) or acutely treated with rapamycin at 2 min post-acquisition start (C). Note the dissolution of condensates upon mCherry recruitment (inset, bottom row, C) as compared to the control (inset, bottom row, B). Scale bar: 10  $\mu$ m

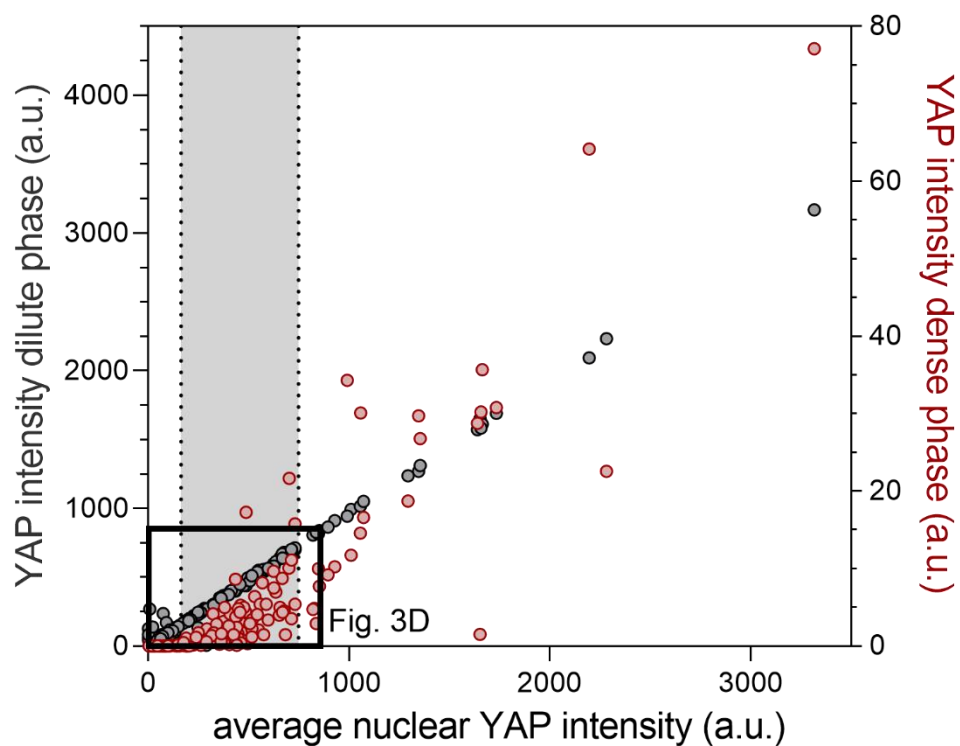

**Figure S2 Extended dataset for dense and dilute phase YAP intensities**

Full dataset of data shown in Fig. 3D (indicated by black rectangle). For details see Figure legend of Fig. 3D.

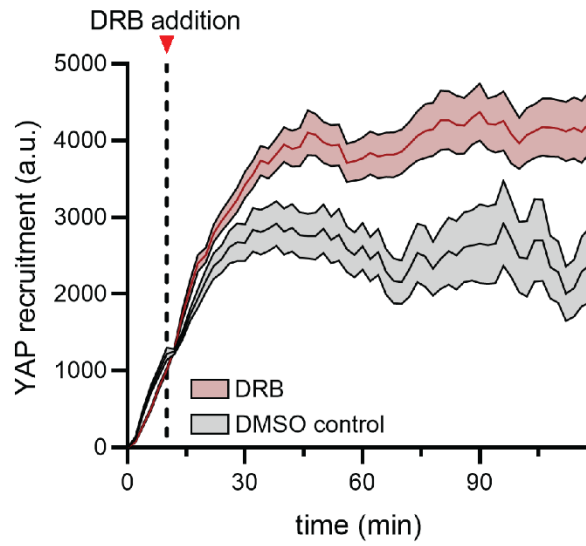

**Figure S3 Quantification of YAP recruitment to synthetic condensates upon inhibition of RNA synthesis**

Quantitation of YAP recruitment to synthetic condensates following inhibition of RNA synthesis with DRB at  $t = 12$  min (dashed line). DMSO serves as the control. Shown are mean  $\pm$  SEM from pooled time courses of  $N = 4$  independent experiments.
